# Supplementary material for: Defining Integrated Care Systems Through Patient Data From Referral Networks in the English National Health Service: A Graph-Based Clustering Study.
Source: Research Square preprint supplement (doi:10.21203/rs.3.rs-519911/v1), 2021-05-18
Supplement: Supplementary file 1 [file b9f8633952079c4385659d5b.docx]

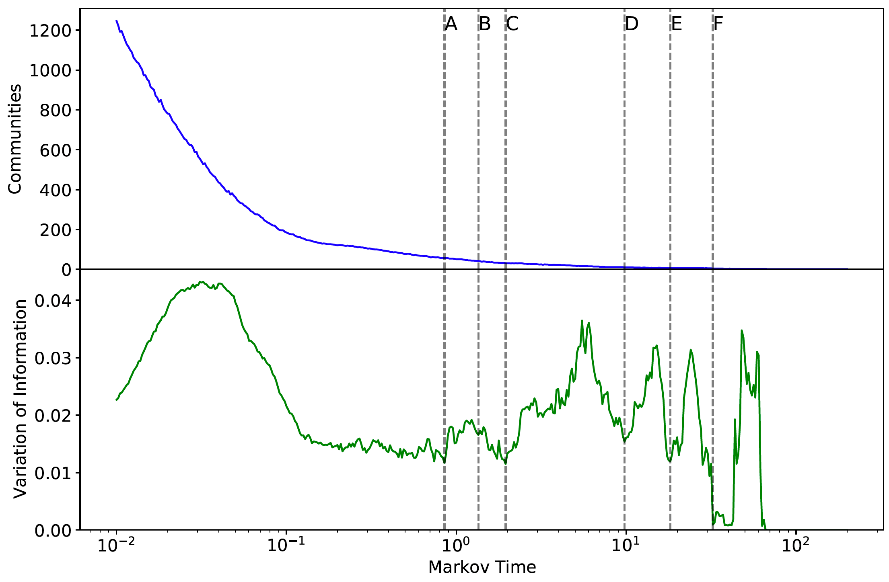


**Additional ile 1: Markov Multiscale Community Detection Output.** The upper panel shows the number of communities in each partition over increasing Markov time. The lower panel shows the variation of information for each timestep. Vertical dashed lines correspond to the partitions shown in **Figure 1**, chosen to reflect local minima in the variation of information.
